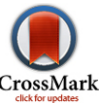

## Correction

# Correction: Absorption of Radionuclides from the Fukushima Nuclear Accident by a Novel Algal Strain

The *PLOS ONE* Staff

### Notice of Republication

This article was republished on March 28, 2014, due to the release of confidential or copyrighted information. Please download the article again to view the corrected version.

### Reference

1. Shimura H, Itoh K, Sugiyama A, Ichijo S, Ichijo M, et al. (2012) Absorption of Radionuclides from the Fukushima Nuclear Accident by a Novel Algal Strain. *PLoS ONE* 7(9): e44200. doi:10.1371/journal.pone.0044200

**Citation:** The *PLOS ONE* Staff (2014) Correction: Absorption of Radionuclides from the Fukushima Nuclear Accident by a Novel Algal Strain. *PLoS ONE* 9(4): e95903. doi:10.1371/journal.pone.0095903

**Published:** April 16, 2014

**Copyright:** © 2014 The *PLOS ONE* Staff. This is an open-access article distributed under the terms of the Creative Commons Attribution License, which permits unrestricted use, distribution, and reproduction in any medium, provided the original author and source are credited.
